# Supplementary material for: Detection and persistence of environmental DNA (eDNA) of a vector mosquito, Culex pipiens pallens
Source: Research Square preprint supplement (doi:10.21203/rs.3.rs-1026102/v1), 2021-11-01
Supplement: Supplementary file 1 [file 5de75c779487efd3beefd654.docx]

Supporting Information

Table S1. qPCR results.

|  | DNA concentration (copies/reaction) | | | |
| --- | --- | --- | --- | --- |
| Sample ID | Tank1 | Tank2 | Tank3 | Tank4 |
| 1 | 0.0 | 0.0 | 0.0 | 12.3 |
| 2 | 6.2 | 0.0 | 0.0 | 0.0 |
| 3 | 0.0 | 5.4 | 0.0 | 0.0 |
| 4 | 157.9 | 0.0 | 0.0 | 397.6 |
| 5 | 19.6 | 0.0 | 0.0 | 21.3 |
| 6 | 4.8 | 0.0 | 754.9 | 7.5 |
| 7 | 27.4 | 6.1 | 27.6 | 1.9 |
| 8 | 20.3 | 4.8 | 2.8 | 2.8 |
| 9 | 1.2 | 0.0 | 1.4 | 0.0 |
| 10 | 5.9 | 1.5 | 2.2 | 0.0 |
| 11 | 1.2 | 0.0 | 0.0 | 0.0 |
| 12 | 1.0 | 0.0 | 0.0 | 0.0 |
| 13 | 0.0 | 0.0 | 0.0 | 0.0 |
| 14 | 1.1 | 0.0 | 0.0 | 0.0 |

DNA concentration = 0.0 indicates no detection.


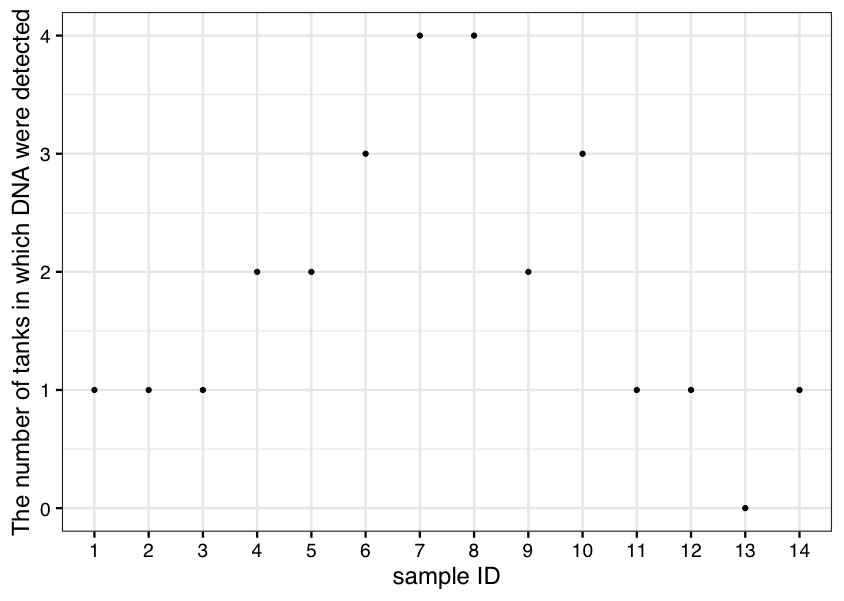


Fig. S1. Result of the tank experiment based on the number of detections in the tank. The vertical axis indicates the number of tanks in which DNA was detected in each sample ID.
